# Supplementary material for: Establishment of a 96-well transwell system using primary human gut organoids to capture multiple quantitative pathway readouts
Source: PubMed Central journal article supplement (PMC10541891; doi:10.1038/s41598-023-43656-z), 2023-09-29
Supplement: 41598_2023_43656_MOESM1_ESM.pdf [file 41598_2023_43656_MOESM1_ESM.pdf]

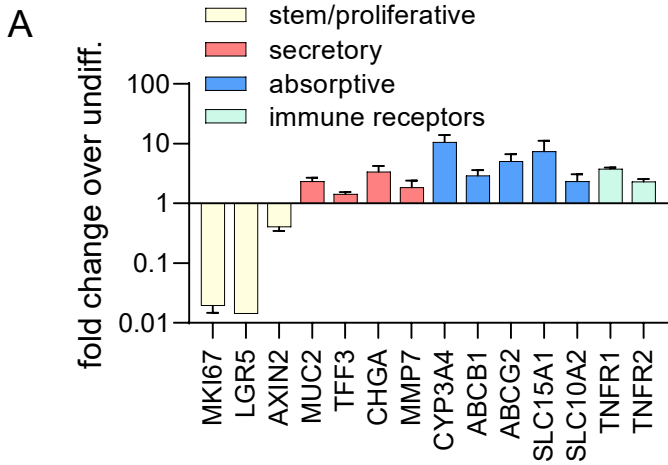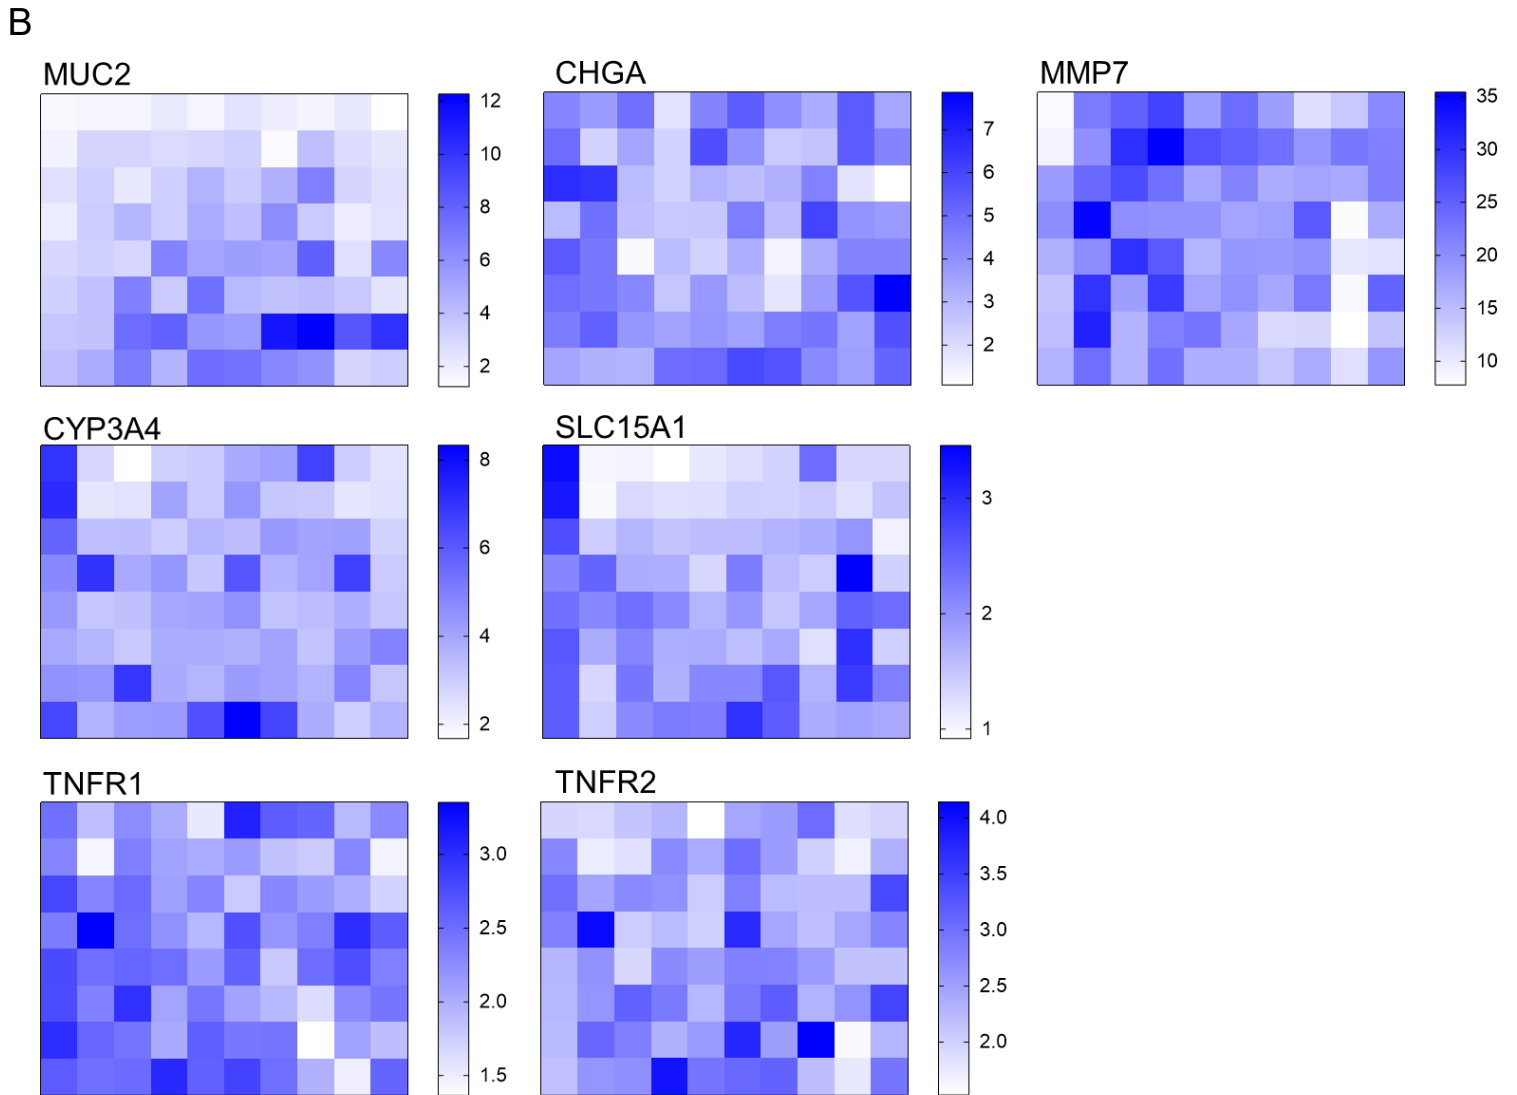

Figure S1

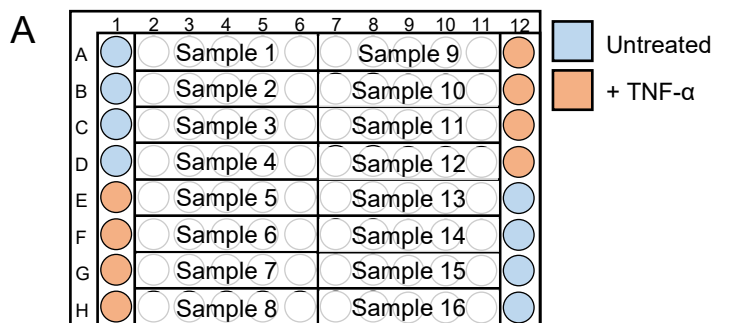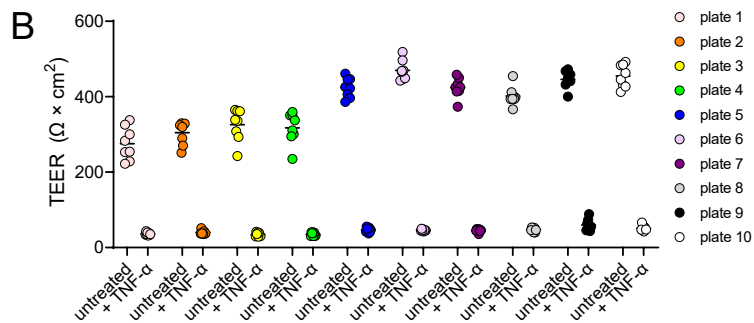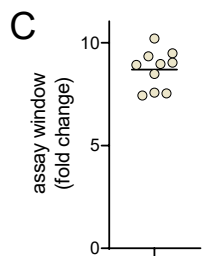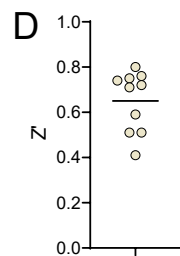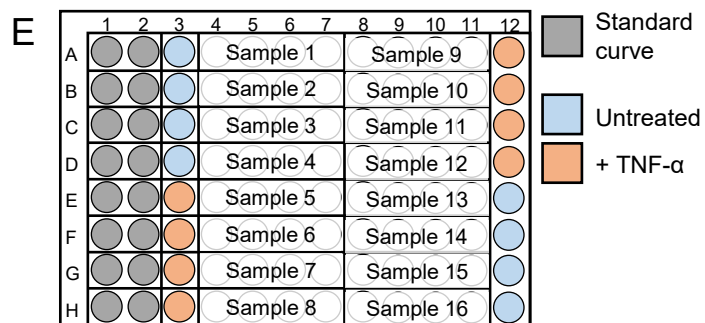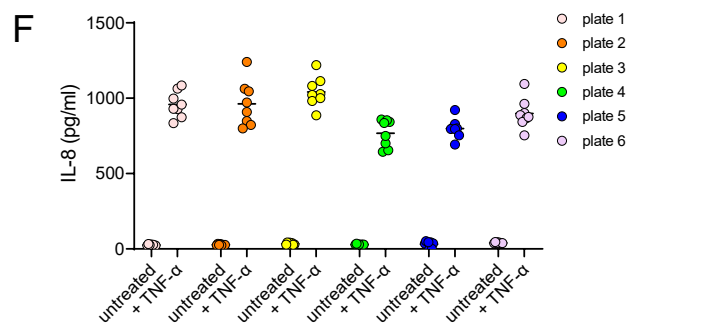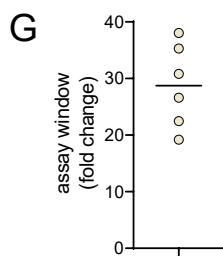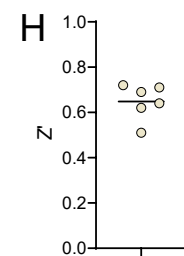

Figure S2

A

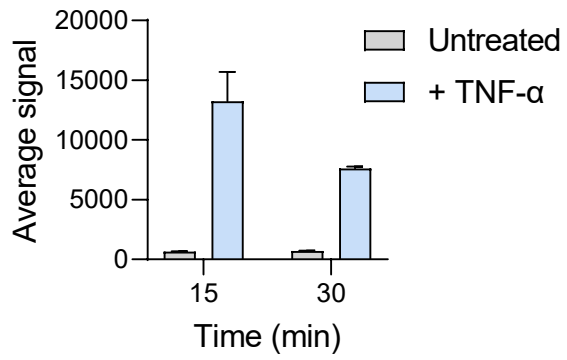

B

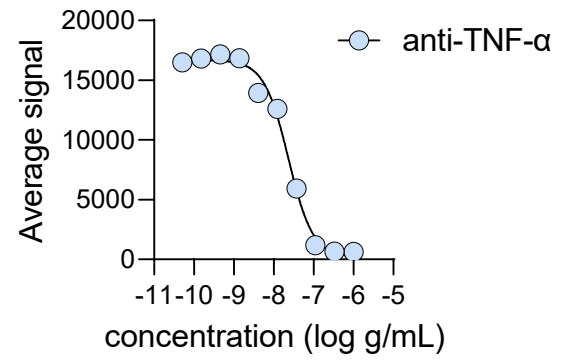

C

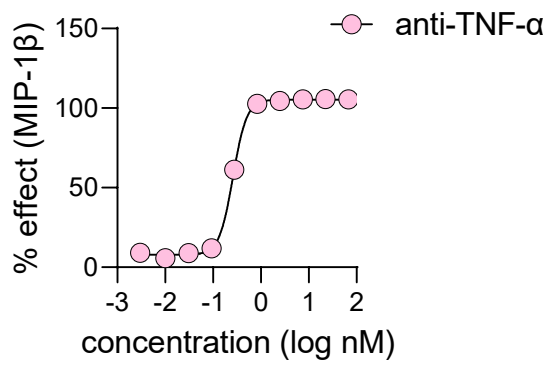

Figure S3

## Figure S1: Developmental gene expression analysis

(A) Gene expression analysis for cultures in 24-well transwells. Markers of stem/proliferative (yellow), secretory (red), and absorptive (blue) cells, as well as TNF receptors (green) were included. Values are reported as fold change in differentiated cultures (day 8) compared to proliferative cultures (day 3). Each data point is an average of 3 wells. (B) Well-to-well variability in developmental gene expression in 96-well transwells. Individual wells (80 wells) are represented using a heat map. Values are reported as fold change in differentiated cultures (day 8) compared to proliferative cultures (day 3).

## Figure S2: Quantifying variability for TEER and cytokine secretion in 96-well transwells

(A) Plate format for TEER assays in 96-well transwells. 16 control wells were included on each plate analyzed: 8 wells with no treatment and 8 wells with 40 ng/mL TNF- $\alpha$ . Typically 5 replicates (wells) were included per test condition on each plate. (B) Plate-to-plate variability for TEER measurements. Data are presented for 10 different plates, analyzed over a period of months. Normalized TEER values are shown for each plate where each symbol represents a measurement from an individual well (8 no treatment wells and 8 TNF- $\alpha$ -treated wells). (C) The assay window for each plate was derived by calculating a ratio of TNF- $\alpha$  treated TEER values to no treatment TEER values. Average = 8.7 with range = 7.4 to 10.2. (D) Statistical effect size was determined by calculating a Z' value for each plate analyzed. Z' calculation is as follows:

$$Z' = 1 - \frac{3(\sigma_p + \sigma_n)}{|\mu_p - \mu_n|}$$

Where  $\mu$  is the mean and  $\sigma$  is the standard deviation of both positive (p) and negative (n) controls. Average = 0.65 with range = 0.41 to 0.80. (E) Plate format for IL-8 analysis of 96-well transwell cultures. Both positive and negative controls were included on each plate. IL-8

quantification by ELISA required 2 columns of the analysis plates be dedicated to a standard curve, therefore only 4 replicates per condition were analyzed. (F) Plate-to-plate variability for IL-8 quantification. Data are presented from 6 independent plate, analyzed over a period of months. Absolute IL-8 levels (pg/mL) are shown for each plate where each symbol represents a measurement from an individual well (8 no treatment wells and 8 TNF- $\alpha$ -treated wells). (G) The assay window for each plate was derived by calculating a ratio of TNF- $\alpha$  treated IL-8 concentrations to no treatment IL-8 concentrations. Average = 28.7 with range = 19.2 to 38.1. (H) Statistical effect size was determined by calculating a Z' as described above. Average = 0.65 with range = 0.51 to 0.72.

Figure S3: Quantifying p65 phosphorylation and MIP-1 $\beta$  secretion in THP-1 and human whole blood

(A) THP-1 cells were untreated or treated with 10 ng/mL of TNF- $\alpha$ . Cells were lysed at the indicated timepoints, and phosphorylated p65 was quantified by MSD assay. (B) THP-1 cells were treated with a dose range of anti-TNF- $\alpha$  in the presence of 10 ng/mL of TNF- $\alpha$ .

Phosphorylated p65 was quantified by MSD assay. (C) Human whole blood was treated with 10 ng/mL of TNF- $\alpha$  and dose-series of anti-TNF- $\alpha$  antibody. MIP-1 $\beta$  secretion was quantified by MSD assay.

Supplemental Table 1: TaqMan probes used in this study

| transcript       | TaqMan ID     | marker type              |
|------------------|---------------|--------------------------|
| PPIB             | Hs00168719_m1 | endogenous control       |
| MKI67            | Hs01032443_m1 | proliferative/stem cells |
| LGR5             | Hs00969422_m1 |                          |
| AXIN2            | Hs00610344_m1 |                          |
| MUC2             | Hs03005103_g1 | secretory cells          |
| TFF3             | Hs00902278_m1 |                          |
| CHGA             | Hs00900370_m1 |                          |
| MMP7             | Hs01042796_m1 |                          |
| P-gp/ABCB1/CD243 | Hs00184500_m1 | absorptive cells         |
| BCRP/ABCG2       | Hs01053790_m1 |                          |
| SLC15A1          | Hs00192639_m1 |                          |
| SLC10A2/ASBT     | Hs01001557_m1 |                          |
| TNFR1/TNFRSF1A   | Hs01042313_m1 | immune receptors         |
| TNFR2/TNFRSF1B   | Hs00961750_m1 |                          |
| IL1B             | Hs01555410_m1 | cytokines                |
| TNF              | Hs00174128_m1 |                          |

Supplemental Table 2: Fluorescence microscopy reagents

| Reagent                                                          | Dilution | Source     | Catalog # |
|------------------------------------------------------------------|----------|------------|-----------|
| Mouse anti-human Mucin 2 antibody                                | 1:200    | Dako       | M731329-2 |
| Rabbit anti-human Lysozyme antibody                              | 1:500    | Invitrogen | PA5-16668 |
| Rabbit anti-human Chromogranin A antibody                        | 1:100    | Abcam      | AB15160   |
| Hoechst 33342                                                    | 1:2000   | Invitrogen | H3570     |
| Goat anti-rabbit Alexa 488                                       | 1:250    | Invitrogen | A-11034   |
| Goat anti-mouse Alexa 594                                        | 1:250    | Invitrogen | A-11032   |
| Click-iT EdU Cell Proliferation Kit for Imaging, Alexa Fluor 594 | N/A      | Invitrogen | C10339    |
